# Supplementary material for: Screening and Improvement of an Anti-VEGF DNA Aptamer
Source: MDPI journal article supplement (doi:10.3390/molecules15010215), 2010-01-07
Supplement: s2 [file s2]

Correction

**Nonaka, N. *et al.* Screening and Improvement of Anti-VEGF Aptamer. *Molecules*, 2010, 15, 215-225**

**Yoshihiko Nonaka, Koji Sode and Kazunori Ikebukuro \***

Department of Biotechnology & Life science, Tokyo University of Agriculture and Technology,  
2-24-16 Naka Cho, Koganei, Tokyo, 184-8588, Japan

\* Author to whom correspondence should be addressed; E-Mail: ikebu@cc.tuat.ac.jp;  
Tel./Fax: +81-42-388-7030.

Received: 8 August 2010 / Published: 24 August 2010

The authors wish to make the following corrections to this paper [1]:

**Results and Discussion:** The sequence in Figure 5 (b) is wrong. The figure should be replaced with the one below.

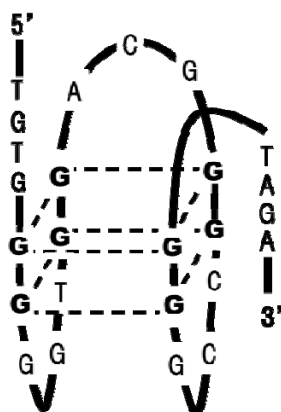

**Section 3.2.1:** The sentence “This library has  $1.8 \times 10^{18}$  kinds of sequence variation.” should be read as: “This library has  $1.15 \times 10^{18}$  kinds of sequence variation.”

**Section 3.2.2:** The sentence “The membranes were then blocked with 100 ng/mL of BSA in TBSTE,

and the aptamers were incubated with the proteins in TBSTE.” should be read as: “The membranes were then blocked with 100 mg/mL of BSA in TBSTE, and the aptamers were incubated with the proteins in TBSTE.

**Section 3.2.3:** The sentence “The structures of the aptamers were analyzed by circular dichroism (CD) spectroscopy using a JASCO (J-725) spectropolarimeter.” should be read as: “The structures of the aptamers were analyzed by circular dichroism (CD) spectroscopy using a JASCO (J-720) spectropolarimeter.”

**Section 3.2.4:** The sentence “Next, VEGF (400 U) dissolved into 10 mM acetate buffer (pH 6.0) was immobilized on the sensor chip as stipulated in the manufacturer’s manual.” should read as: “Next, VEGF (200 pmol) dissolved into 10 mM acetate buffer (pH 6.0) was immobilized on the sensor chip as stipulated in the manufacturer’s manual.”

**Conclusions:** The sentence “V7t1, the truncated mutant of Vap7, has a short sequence (29-mer) and a strong affinity for VEGF” should be read as: “V7t1, the truncated mutant of Vap7, has a short sequence (25-mer) and a strong affinity for VEGF.”

## Reference

1. Yoshihiko, N.; Koji, S.; Kazunori, I. Screening and Improvement of Anti-VEGF Aptamer. *Molecules* **2010**, *15*, 215-225.

© 2010 by the authors; licensee MDPI, Basel, Switzerland. This article is an Open Access article distributed under the terms and conditions of the Creative Commons Attribution license (<http://creativecommons.org/licenses/by/3.0/>).
